# Supplementary material for: Overcoming Limitations Inherent in Sulfamidase to Improve Mucopolysaccharidosis IIIA Gene Therapy
Source: PubMed Central journal article supplement — Mol Ther. 2018 Jan 31;26(4):1118–26. doi: 10.1016/j.ymthe.2018.01.010 (PMC6079371; doi:10.1016/j.ymthe.2018.01.010), 2018-01-31
Supplement: mmc1.pdf [file mmc1.pdf]

**YMTHE, Volume 26**

**Supplemental Information**

**Overcoming Limitations**

**Inherent in Sulfamidase to Improve**

**Mucopolysaccharidosis IIIA Gene Therapy**

**Yonghong Chen, Shujuan Zheng, Luis Tecedor, and Beverly L. Davidson**

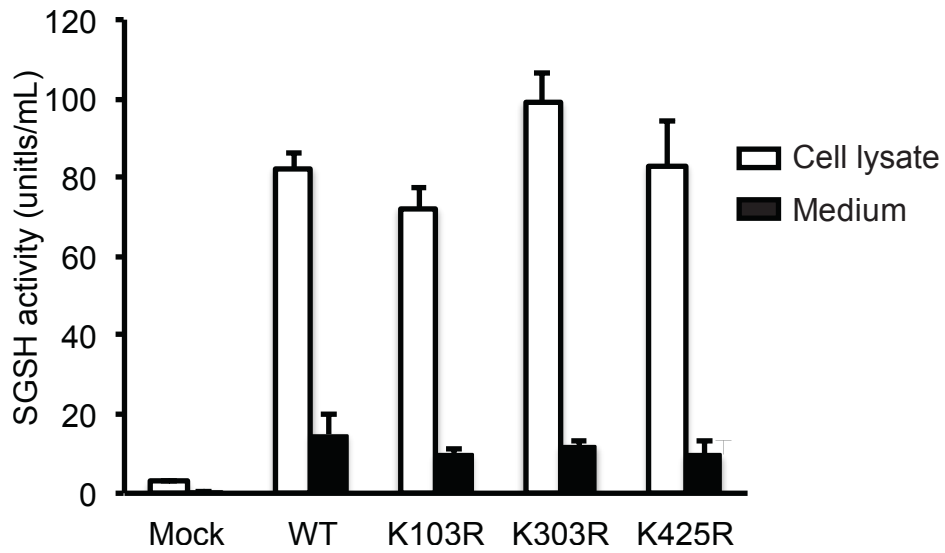

**Fig. S1.** Effects of ubiquitination site modifications on SGSH enzyme secretion. Three SGSH variants were generated by mutagenesis (K-to-R) to eliminate known ubiquitin binding sites at K103, K303 and K425 (Table S1). Vectors expressing wild type or SGSH variants were transfected into HEK 293 cells and cells and media collected and assayed for SGSH enzyme activity, n=3, data are mean  $\pm$  SD.

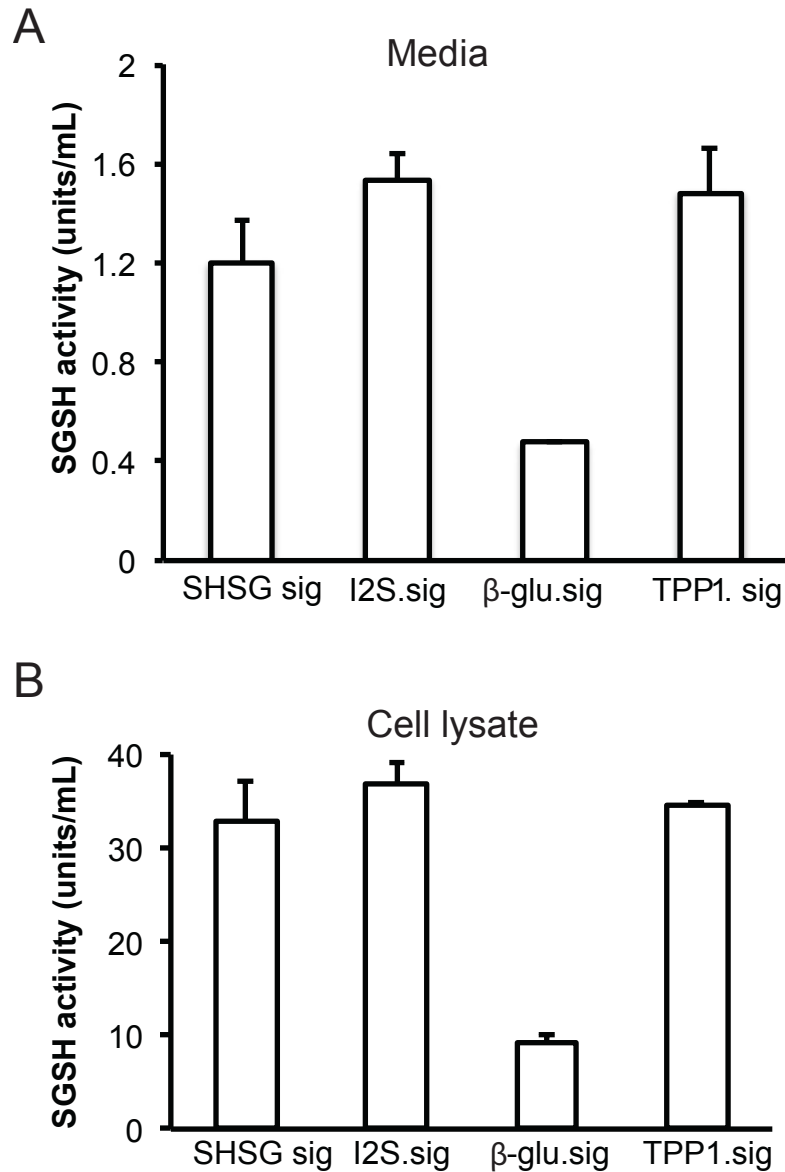

**Fig. S2.** Effects of different signal peptides on SGSH enzyme secretion. SGSH signal peptide was substituted with signal peptides from iduronate-2-sulphatase (I2S),  $\beta$ -Glu or TPP1. Vectors were transfected into HEK 293 cells and media (a) and cells (b) collected and assayed for SGSH enzyme activity, n=3, data are mean  $\pm$  SD.

**Table S1.** Primer sequences for the construction of the SGSH variants

| M6P variants       | Mutation site | Primer   |                          |
|--------------------|---------------|----------|--------------------------|
| SGSHv1             | N41Q          | Primer 1 | CTCGAGGCCACCATGAGCT      |
|                    |               | Primer 2 | CGATGGCGCTGTTCTGGTACG    |
|                    |               | Primer 3 | GCGTACCAGAACAGCGCCATC    |
|                    |               | Primer 4 | GACGGAGGTCCTTGTACCAG     |
| SGSHv2             | N142Q         | Primer 1 | CTCGAGGCCACCATGAGCT      |
|                    |               | Primer 2 | GACGGAGCCCTGCTCCTCC      |
|                    |               | Primer 3 | GGAGGAGCAGGGCTCCGTC      |
|                    |               | Primer 4 | GACGGAGGTCCTTGTACCAG     |
| SGSHv3             | N151Q         | Primer 1 | CTCGAGGCCACCATGAGCT      |
|                    |               | Primer 2 | GCTTAATTCTAGTGATCTGCCGCC |
|                    |               | Primer 3 | GGCGGCAGATCACTAGAATTAAGC |
|                    |               | Primer 4 | GACGGAGGTCCTTGTACCAG     |
| SGSHv4             | N264Q         | Primer 1 | CTCGAGGCCACCATGAGCT      |
|                    |               | Primer 2 | CCAGTGTGTCCTGCAGGACAC    |
|                    |               | Primer 3 | GTGTCCTGCAGGACACACTGG    |
|                    |               | Primer 4 | GACGGAGGTCCTTGTACCAG     |
| SGSHv5             | N413Q         | Primer 1 | CTCGAGGCCACCATGAGCT      |
|                    |               | Primer 2 | GTGGTGCCTGCAGGAGGTC      |
|                    |               | Primer 3 | GACCTCCTGCAGCGCACCCAC    |
|                    |               | Primer 4 | GACGGAGGTCCTTGTACCAG     |
| Ubiquitin variants |               |          |                          |
| SGSH.Uv1           | K103R         | Primer 1 | CTCGAGGCCACCATGAGCT      |
|                    |               | Primer 2 | GCTCCGCACCCGGTCAAGG      |
|                    |               | Primer 3 | CCTTCGACCGGGTGC GGAGC    |
|                    |               | Primer 4 | GACGGAGGTCCTTGTACCAG     |
| SGSH.Uv2           | K303R         | Primer 1 | CTCGAGGCCACCATGAGCT      |
|                    |               | Primer 2 | CCCAGCGGCGTGGGTGCTC      |
|                    |               | Primer 3 | CCCAGCGGCGTGGGTGCTC      |
|                    |               | Primer 4 | GACGGAGGTCCTTGTACCAG     |
| SGSH.Uv3           | K425R         | Primer 1 | CTCGAGGCCACCATGAGCT      |
|                    |               | Primer 2 | GACGGAGGTCCCGGTACCAGC    |
